# Supplementary material
Source: PubMed Central journal article supplement (PMC4391550)
Supplement: 1d2a8968ab381a8955e9cd8996b1afdd_genetics.114.173187-9.pdf [file 1d2a8968ab381a8955e9cd8996b1afdd_genetics.114.173187-9.pdf]

**Table S1 Excisionase activity of all Int\* variants, and accessibility of several genomic locations.**

| A.                  |                           |                  |                      |               |                     |                           |  |
|---------------------|---------------------------|------------------|----------------------|---------------|---------------------|---------------------------|--|
| <u>Int*</u>         | <u>Excision Frequency</u> | <u>N (vials)</u> | <u>Int* location</u> | <u>Vector</u> | <u>Landing Site</u> | <u>Resident Transgene</u> |  |
| E449K               | 64% ± 8%                  | 10               | ZH-86Fb              | Gen1          | attP18              | pJFRC2-UAS-mCD8gfp        |  |
| E449K               | 51% ± 11%                 | 10               | ZH-86Fb              | Gen2          | attP18              | pJFRC2-UAS-mCD8gfp        |  |
| E449K, E463K        | 61% ± 10%                 | 10               | ZH-86Fb              | Gen1          | attP18              | pJFRC2-UAS-mCD8gfp        |  |
| E456K               | 0.1% ± 0.2%               | 10               | ZH-86Fb              | Gen2          | attP18              | pJFRC2-UAS-mCD8gfp        |  |
| E449H               | 40% ± 8%                  | 10               | ZH-86Fb              | Gen2          | attP18              | pJFRC2-UAS-mCD8gfp        |  |
| E449H, E463H        | 1% ± 2%                   | 10               | ZH-86Fb              | Gen2          | attP18              | pJFRC2-UAS-mCD8gfp        |  |
| E449H, E463G        | 23% ± 6%                  | 10               | ZH-86Fb              | Gen2          | attP18              | pJFRC2-UAS-mCD8gfp        |  |
| E449G, E463H        | 3% ± 2%                   | 10               | ZH-86Fb              | Gen2          | attP18              | pJFRC2-UAS-mCD8gfp        |  |
| E449K, E456K, E463K | 16% ± 7%                  | 8                | ZH-86Fb              | Gen1          | attP40              | pJFRC2-UAS-mCD8gfp        |  |

  

| B.                  |                 |                               |                     |                      |                  |                           |  |
|---------------------|-----------------|-------------------------------|---------------------|----------------------|------------------|---------------------------|--|
| <u>Landing Site</u> | <u>Location</u> | <u>Landing Site Reported</u>  | <u>Int*</u>         | <u>Int* location</u> | <u>N (vials)</u> | <u>Excision Frequency</u> |  |
| <b>attP18</b>       | <b>X - 6C</b>   | <b>Markstein et al., 2008</b> | <b>E449K, E463K</b> | <b>ZH-51C</b>        | <b>10</b>        | <b>36% ± 8%</b>           |  |
| <b>attP18</b>       | <b>X - 6C</b>   | <b>Markstein et al., 2008</b> | <b>E449K, E463K</b> | <b>ZH-86Fb</b>       | <b>10</b>        | <b>62% ± 16%</b>          |  |
| attP40              | 2L - 25C        | Markstein et al., 2008        | E449K               | ZH-86Fb              | 6                | 34% ± 10%                 |  |
| su(Hw)attP5         | 2R - 51E        | Ni et al., 2009               | E449K               | ZH-86Fb              | 7                | 60% ± 16%                 |  |
| attP2               | 3L - 68A        | Groth et al., 2004            | E449K               | ZH-51C               | 5                | 28% ± 10%                 |  |
| VK00005             | 3L - 75B        | Venken et al., 2006           | E449K               | ZH-51C               | 7                | 26% ± 10%                 |  |
| su(Hw)attP1         | 3R - 87B        | Ni et al., 2009               | E449K               | ZH-51C               | 7                | 63% ± 10%                 |  |
| su(Hw)attP2         | 3R - 92D        | Ni et al., 2009               | E449K               | ZH-51C               | 7                | 59% ± 14%                 |  |

**Table S1. The excisionase activity of Int\* variants, and accessibility of several genomic locations.**

(A) The activity of each Int\* variant (column 1) was assayed using the genetic scheme detailed in Figure S1B. The observed activity (column 2) of variants ranges from virtually undetectable to greater than 60%. The fifth column, "Vector," indicates the plasmid in which Int\* was cloned. These two plasmids are identical in the core transgene (hsp70P-Int\*-SV40), though sequence differences outside this region may influence Int\* expression (compare first and second rows). See also Figure 1D. (B) Int\* activity assayed at multiple genomic locations: Int\* at *ZH-51C* or *ZH-86Fb* were used to excise pJFRC2 from various landing sites on the *X* and third or second chromosomes, respectively. The first two rows (bold) permit a comparison between levels of Int\* activity when expressed from *ZH-51C* or *ZH-86Fb*. Int\* excised pJFRC2 from landing sites on every major chromosome arm, suggesting that the most (and perhaps all) sites in the genome are accessible to Int\*.
