# Supplementary material
Source: PubMed Central journal article supplement (PMC4391550)
Supplement: 734cbbdfb2ca4bab2fe00cf255ecc977_genetics.114.173187-6.pdf [file 734cbbdfb2ca4bab2fe00cf255ecc977_genetics.114.173187-6.pdf]

A. Crossing scheme to shuffle transgenes between landing sites using *Int\** and *Int\** (wildtype).

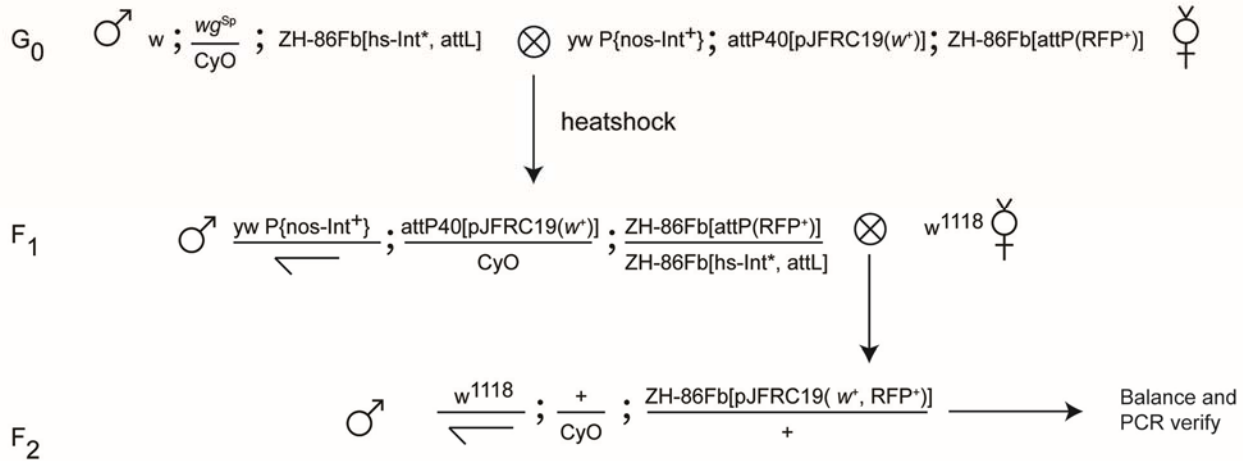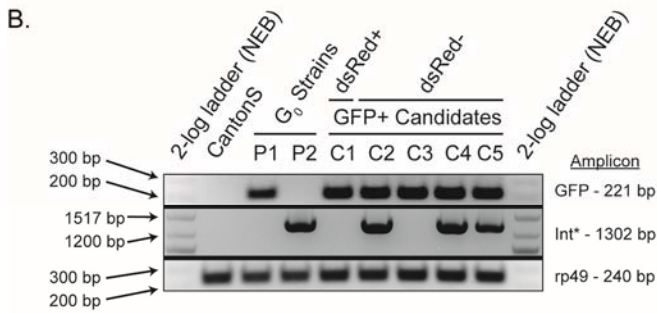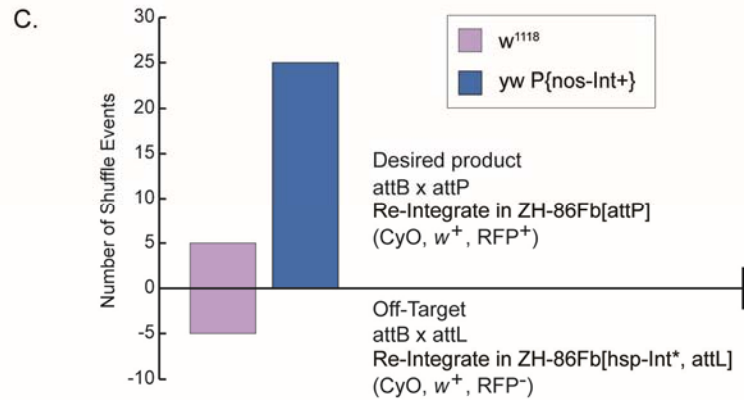

Figure S6. Genetics and integration characteristics of *Int\**/*Int* transgene shuffling.

**Figure S6** Genetics and integration characteristics of *Int\**/*Int* transgene shuffling. (A) Crossing scheme to shuffle pJFRC2 between two autosomal landing sites. In this example, wild-type integrase is supplied by an X-linked transgene (Bischof *et al.* 2007). The movement of pJFRC19 from *attP40* (donor on *II*) to *ZH-86Fb* (receiver on *III*) was followed using the transgene's mini-white marker. Flies in the F<sub>2</sub> generation that carried mini-white and *CyO* carried candidate shuffle events; genetic mapping and PCR were used to confirm the presence of pJFRC19 at the receiver site. (B) Molecular characterization of selected shuffle candidates. Top – Genomic PCR confirmed the presence of GFP in five shuffle candidates (C1-C5). P1 corresponds to the maternal G<sub>0</sub> genotype, *w*; *attP40*[pJFRC19(*w*<sup>+</sup>)]; *ZH86Fb*[*attP*(*RFP*<sup>+</sup>)]. P2 corresponds to the paternal G<sub>0</sub> genotype, *w*; *wg*<sup>Sp</sup>/*CyO*; *ZH86Fb*[*hs-Int\**, *attL*]. Middle – Genomic PCR detected *Int\** in three shuffle candidates. *Int\** was not detected in candidate C1, since pJFRC19 shuffled into the receiver landing site (marked by *3xP3-DsRed*). *Int\** was detected in C2, C4, and C5. This indicates that pJFRC19 re-integrated on the *hs-Int\** chromosome, which is corroborated by the absence of *DsRed* expression in these flies. The *attL* sequence downstream of *hs-Int\** (see Figure S1A) presented a potential re-integration target due to the relaxed integration site specificity of *Int\**. The re-integration site of candidate C3 was not determined, though the lack of *DsRed* strongly suggests this was off-target. Bottom – PCR control with *rp49*. (C) Wild-type *Int* enforces canonical attP x attB recombination during transgene shuffling: Flies were scored for the presence of the *ZH-86Fb* landing site marker *3xP3-DsRed* to distinguish re-integration at the receiver site from off-target integration (see panel B). When *Int\** provided both excisionase and integrase activities, half of the recovered candidates lacked *DsRed*, indicating re-integration at a site other than the receiver site. In contrast, in the presence of wild-type integrase, all candidates re-integrated at receiver landing site.
