# Supplementary material
Source: PubMed Central journal article supplement (PMC4391550)
Supplement: 93864460f51708b13156de7b48101709_genetics.114.173187-2.pdf [file 93864460f51708b13156de7b48101709_genetics.114.173187-2.pdf]

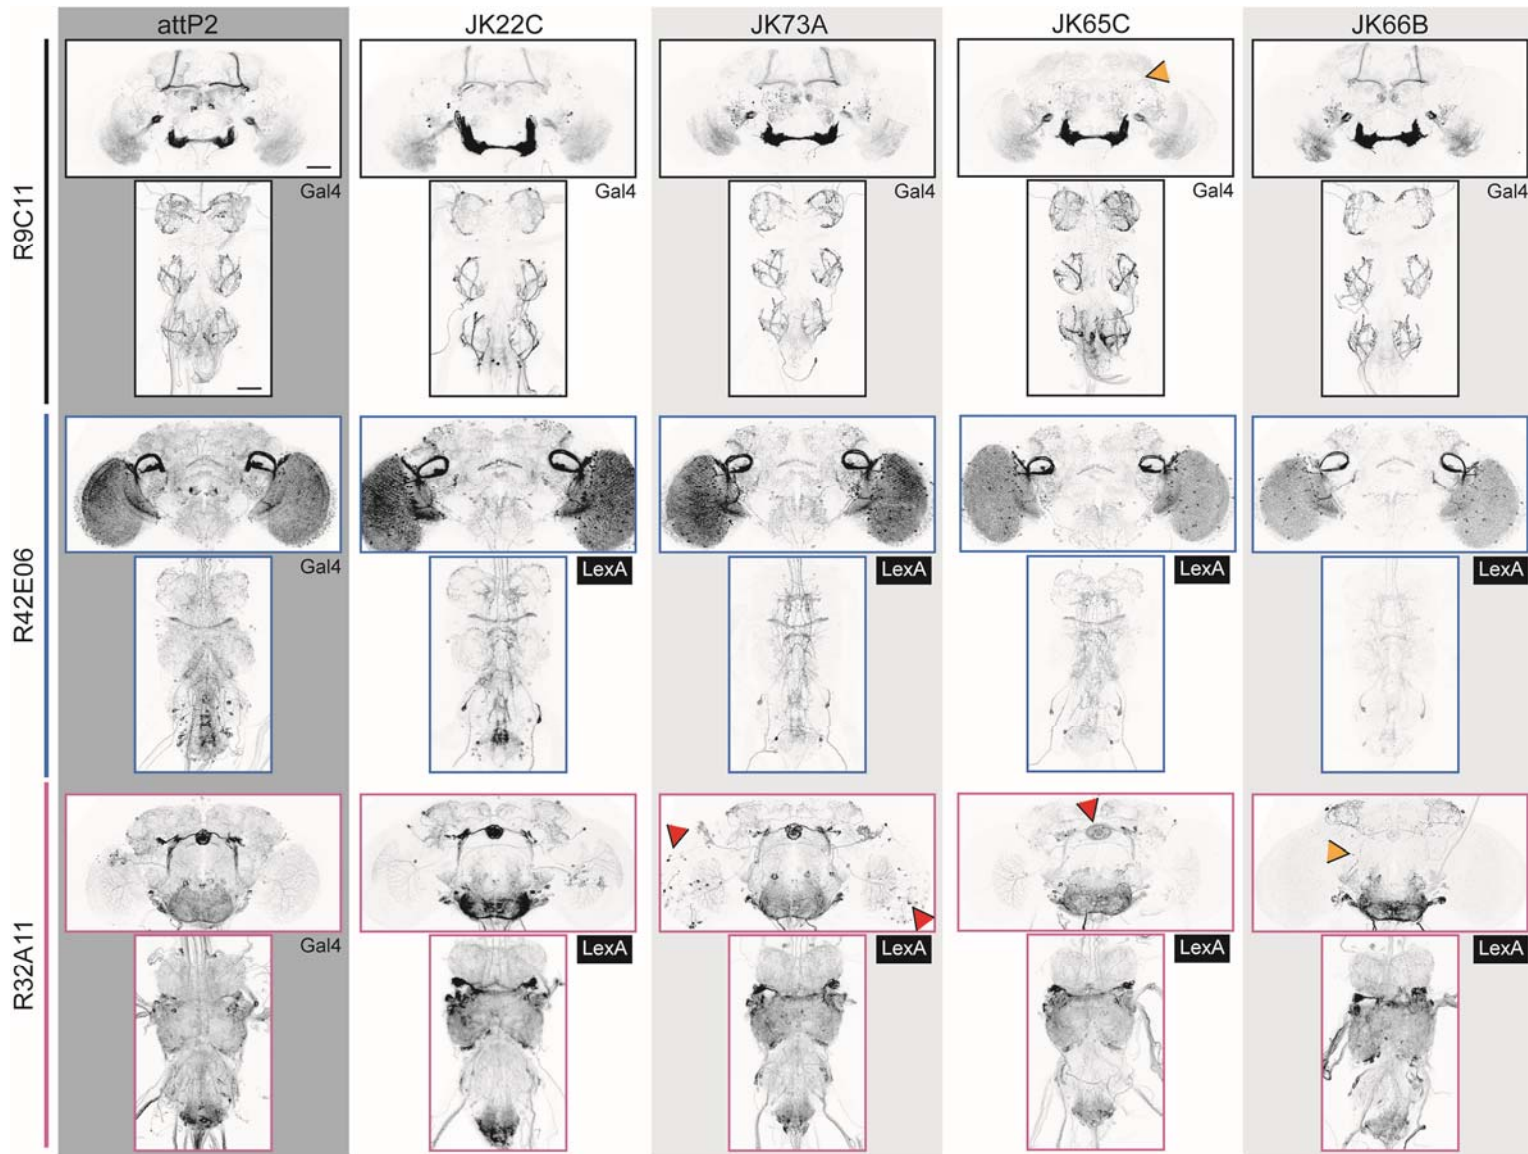

Figure S4. Behavior of additional driver transgenes in a subset of new landing sites.

**Figure S4** Behavior of additional driver transgenes in new landing sites: Three additional driver transgenes were integrated into the four best candidate landing sites. These were crossed to *attP2[pJFRC12-UAS-myrGFP]* (for Gal4 transgenes) or *attP2[pJFRC19-LexAop2-myrGFP]* (for LexA transgenes), and immunostained to detect GFP. Generally, the expression pattern of each driver in the new landing sites was similar to that construct's expression in *attP2*, though particular landing site/driver combinations exhibited some deviations. Orange arrowheads indicate reduced or absent expression (relative to *attP2[driver]*); red arrowheads denote expression in novel cell types. Images are maximum projections of representative samples of adult brains and ventral nerve cords. Scale bars, 50  $\mu\text{m}$ .
