# Supplementary material
Source: PubMed Central journal article supplement (PMC4391550)
Supplement: f6ef20c2ff6ffb5dfa1475cf858c4d7f_genetics.114.173187-7.pdf [file f6ef20c2ff6ffb5dfa1475cf858c4d7f_genetics.114.173187-7.pdf]

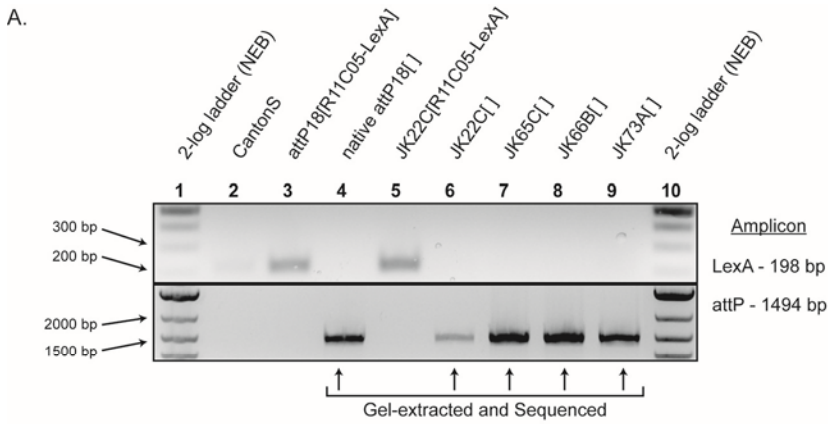

B.

attP  
 GTAGTGCCCCAACTGGGGTAACCT **TTG** AGTTCTCTCAGTTGGGGGCGTAG

attP18 ...GA GTAGTGCCCCAACTGGGGTAACCT **TTG** AGTTCTCTCAGTTGGGGGCGTAG GG...

JK22C ...GA GTAGTGCCCCAACTGGGGTAACCT **TTG** AGTTCTCTCAGTTGGGGGCGTAG GG...

JK65C ...GA GTAGTGCCCCAACTGGGGTAACCT **TTG** AGTTCTCTCAGTTGGGGGCGTAG GG...

JK66B ...GA GTAGTGCCCCAACTGGGGTAACCT **TTG** AGTTCTCTCAGTTGGGGGCGTAG GG...

JK73A ...GA GTAGTGCCCCAACTGGGGTAACCT **TTG** AGTTCTCTCAGTTGGGGGCGTAG GG...

C.

|       | Location  | Insertion                              |
|-------|-----------|----------------------------------------|
| JK22C | 2L: 22C3  | 5' - <i>GlyP</i>   <i>CG4259</i> - 3'  |
| JK64A | 3L: 64A12 | 5' UTR of <i>CG1309</i>                |
| JK65C | 3L: 65C3  | 5' UTR of <i>dikar</i>                 |
| JK66B | 3L: 66B4  | 5' - <i>Ect4</i>   <i>CR32360</i> - 3' |
| JK73A | 3L: 73A9  | 5' - <i>Smn</i>   <i>nxf2</i> - 3'     |
| JK80B | 3R: 80B1  | 5' UTR of <i>CG33170</i>               |
| JK87B | 3R: 87B9  | 5' UTR of <i>CG5196</i>                |

Figure S5. Sequencing and genomic location of new landing sites.

**Figure S5** Molecular characterization of new landing sites. (A) Genomic PCR verification of R11C05-LexA excision. Top – The presence of R11C05-LexA was probed using primers that bind in the LexA coding sequence. Controls that harbor the transgene (lanes 3 and 5) showed amplification, but not native attP18 or the new landing sites following treatment with Int\* (lanes 4 and 6-9). Bottom – Amplification of a region containing attP corroborates the absence of the R11C05-LexA transgene. Amplification was successful in samples with an intact attP, but fails in samples with an integrated transgene. Arrows indicate bands that were gel-extracted and sequenced. (B) To confirm the integrity of reconstituted attPs in new landing sites, the PCR products indicated in (A) were sequenced and compared to wild-type attP. The cross-over nucleotides where recombination occurs are indicated in bold. (C) Genomic location of new landing sites: Landing sites were mapped to the genome using splinkerette PCR (Potter and Luo 2010).
